# Supplementary material for: Online Parallel Accumulation–Serial Fragmentation (PASEF) with a Novel Trapped Ion Mobility Mass Spectrometer
Source: PubMed Central journal article supplement (PMC6283298; doi:10.1074/mcp.tir118.000900), 2018-11-01
Supplement: 138569_1_supp_227044_phgp3g.pdf [file 138569_1_supp_227044_phgp3g.pdf]

**Supplementary Figures for**

**Online parallel accumulation – serial fragmentation (PASEF) with a novel trapped ion mobility mass spectrometer**

Florian Meier, Andreas-David Brunner, Scarlet Koch, Heiner Koch, Markus Lubeck, Michael Krause, Niels Goedecke, Jens Decker, Thomas Kosinski, Melvin A. Park, Nicolai Bache, Ole Hoerning, Jürgen Cox, Oliver Räther, Matthias Mann

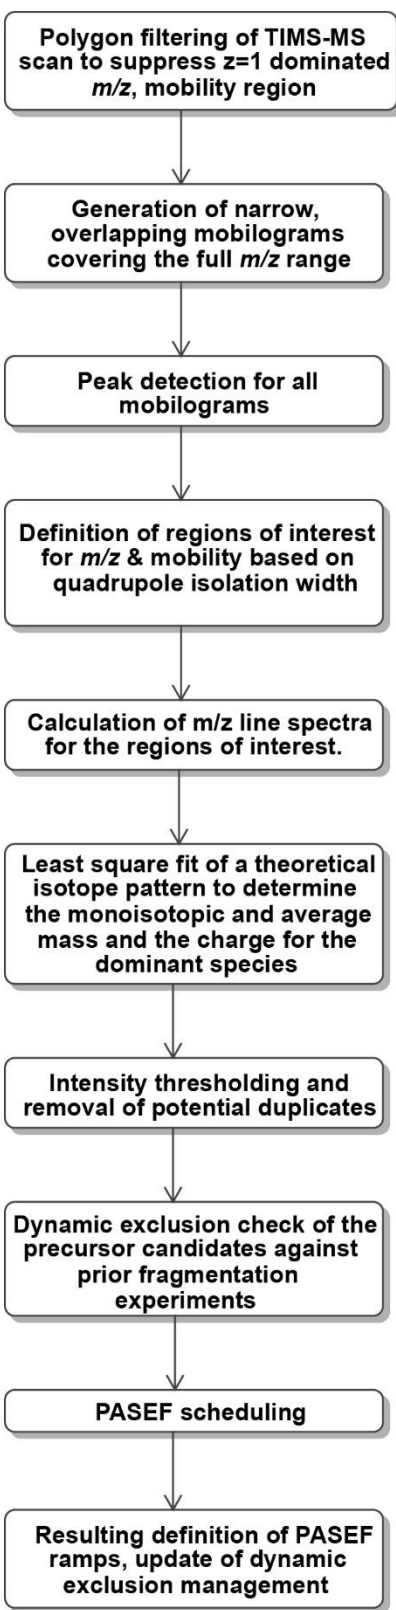

**Supplementary Figure 1.** Schematic of the online PASEF precursor ion selection algorithm.

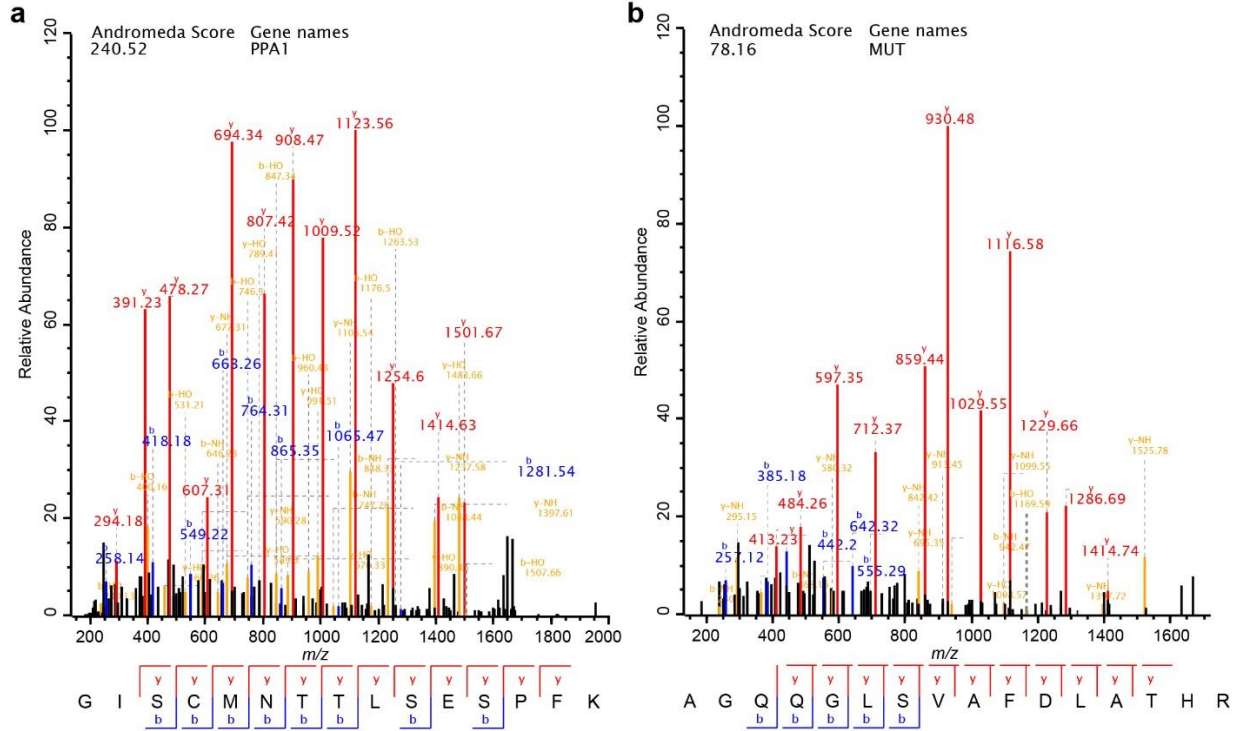

**Supplementary Figure 2.** MaxQuant identification of co-eluting peptides of very similar mass, which would have been co-fragmented without TIMS.
